# Supplementary material for: Energetic polyazole polynitrobenzenes and their coordination complexes
Source: Royal Society of Chemistry journal article supplement (doi:10.1039/b915090k), 2009-01-01
Supplement: b915090k.pdf [file b915090k.pdf]

## Supporting Information

### **Energetic polyazole polynitrobenzene and their coordination complexes**

Zhuo Zeng,<sup>a</sup> Yong Guo,<sup>b</sup> Brendan Twamley,<sup>b</sup> and Jean 'ne M. Shreeve\*<sup>b</sup>

<sup>a</sup> College of Chemistry & Environment, South China Normal University, Guangzhou, P. R. China, 510006

<sup>b</sup> Department of Chemistry, University of Idaho, Moscow, ID 83844-2343 USA

Email: [jshreeve@uidaho.edu](mailto:jshreeve@uidaho.edu); Fax: +1-208 885-9146

### ***CONTENTS***

**Part A:** Experimental section for polyazole polynitrobenzene **3a-f, 4, 6, 7**.

**Part B:** DSC data for **3a-f, 4, 6, 7**.

**Part C:** Crystallographic Data and Structure Refinement Parameters of compound **3e, 3f, 6, 7**.

**Part D:** *Ab Initio* computational data

## Part A: Experimental section for polyazole polynitrobenzene **3a-f**, **4**, **6**, **7**.

### General experimental methods.

*Caution:* For handling these energetic materials, small scale and best safety practices (leather gloves, face shield) are strongly encouraged to be used in undertaking preparation of polyazole polynitrobenzene (**3a-f**).

<sup>1</sup>H, <sup>13</sup>C NMR spectra were recorded on a 300 MHz Bruker Avance nuclear magnetic resonance spectrometer operating at 300.1, 282.4 and 75.5 MHz, respectively, using CDCl<sub>3</sub>, CD<sub>3</sub>CN and [D<sub>6</sub>]DMSO as solvent unless otherwise indicated. Chemical shifts (<sup>1</sup>H and <sup>13</sup>C NMR) are reported relative to Me<sub>4</sub>Si. The crystallization, melting and decomposition points were obtained on a differential scanning calorimeter at a scan rate of 10°C/min, respectively. Densities of solid salts were obtained at room temperature by employing a Micromeritics Accupyc 1330 gas pycnometer. Elemental analyses were determined using an Exeter CE-440 elemental analyzer.

### General procedure for preparation polyazole polynitrobenzene **3a-f**.

To a round-bottomed flask fitted with a reflux condenser, is added 0.5 mmol 2-fluoro-1,3,5-trinitrobenzene (or 2,4-difluoro-1,3,5-trinitrobenzene, 1-amino-3,5-difluorotrinitrobenzen for diazole compound **3c-3d** and **3e**, or 1,3,5-trifluorotrinitrobenzene for triazole for tritriazole compound **3f**) in 15 mL benzene under nitrogen, and 0.5 mmol (1.0 mmol diazole compound **3c-3d**, **3e** or 1.5 mmol for triazole compound **3f**) 1-trimethylsilylimidazole or 1-trimethylsilyltriazole was added drop wise slowly. The yellow precipitate was yield immediately, then the reaction mixture was allowed to stir at room temperature overnight, the mixture was filtered, and washed with CH<sub>2</sub>Cl<sub>2</sub> three times (3×5 mL) to give the crude product. The analytic pure sample was obtained by recrystalization from CH<sub>3</sub>CN.

2-1H- imidazol-1-yl-1,3,5-trinitrobenzene (**3a**)<sup>1</sup>: Yield 90%; yellow solid; IR (KBr):  $\tilde{\nu}$  = 3107, 2361, 1610, 1549, 1345, 1078, 791, 650 cm<sup>-1</sup>; Mp. (DSC) 216 °C (decomposition); <sup>1</sup>H NMR (CD<sub>3</sub>CN):  $\delta$  = 9.08 (s, 2H), 7.73 (s, 1H), 7.26 (s, 1H), 7.22 (s, 1H).

2-1H- triazol-1-yl-1,3,5-trinitrobenzene (**3b**)<sup>1</sup>: Yield 90%; yellow solid; IR (KBr):  $\tilde{\nu}$  = 3105, 2881, 1614, 1548, 1209, 1035, 918, 662 cm<sup>-1</sup>; Mp. (DSC) 224 (melting point), 256 °C (decomposition); <sup>1</sup>H NMR (CD<sub>3</sub>CN):  $\delta$  = 9.08 (s, 2H), 8.67 (s, 1H), 8.20 (s, 1H).

The crude product was purified by silica gel column chromatography. The product was isolated using hexane-ethyl acetate (1:3) as eluent to give **3c**.

2,4-di-1H- imidazol-1-yl-1,3,5-trinitrobenzene (**3c**): Yield 60%; orange-yellow solid; IR (KBr):  $\tilde{\nu}$  = 3151, 2967, 2823, 1613, 1541, 1307, 843, 708 cm<sup>-1</sup>; Mp. (DSC) 156 °C (decomposition); <sup>1</sup>H NMR (CD<sub>3</sub>CN):  $\delta$  = 9.02 (s, 1H), 7.69 (s, 2H), 7.23 (s, 2H), 7.19 (s, 2H); C,H,N analysis (%): calcd for C<sub>12</sub>H<sub>7</sub>N<sub>7</sub>O<sub>6</sub>.H<sub>2</sub>O (363.06): C 39.68, H 2.50, N 26.99; Found: C 40.34, H 2.30, N 26.43.

2,4-di-1H- triazol-1-yl-1,3,5-trinitrobenzene (**3d**): Yield 70%; yellow solid; IR (KBr):  $\tilde{\nu}$  = 3130, 1602, 1550, 1508, 1337, 1129, 993, 868  $\text{cm}^{-1}$ ; Mp. (DSC) 261 °C (decomposition);  $^1\text{H}$  NMR ( $\text{CD}_3\text{CN}$ ):  $\delta$  = 9.09 (s, 1H), 8.67 (s, 2H), 8.22 (s, 2H); C,H,N analysis (%): calcd for  $\text{C}_{10}\text{H}_5\text{N}_9\text{O}_6$  (347.04): C 34.59, H 1.45, N 36.31; Found: C 34.44, H 1.30, N 36.36.

1-Amino-3,5-di-1H-1,2,4-triazolyltrinitrobenzene (**3e**): Yield 80%; yellow solid; IR (KBr):  $\tilde{\nu}$  = 3320, 1623, 1520, 1408, 1326, 1121, 933, 720  $\text{cm}^{-1}$ ; Mp. (DSC) 298 °C (decomposition);  $^1\text{H}$  NMR ( $\text{CD}_3\text{CN}$ ):  $\delta$  = 8.58 (s, 2H), 8.16 (s, 2H), 6.83 (s, 2H);  
C,H,N analysis (%): calcd for  $\text{C}_{10}\text{H}_6\text{N}_{10}\text{O}_6$  (362.05): C 33.16, H 1.67, N 38.07; Found: C 33.35, H 1.60, N 37.36.

2,4,6-tri-1H- triazol-1-yl-1,3,5-trinitrobenzene (**3f**): Yield 80%; yellow solid; IR (KBr):  $\tilde{\nu}$  = 3115, 1773, 1558, 1508, 1335, 1276, 990, 665  $\text{cm}^{-1}$ ; Mp. (DSC) 228 °C (decomposition);  $^1\text{H}$  NMR ( $\text{CD}_3\text{CN}$ ):  $\delta$  = 8.71 (s, 3H), 8.25 (s, 3H); C,H,N analysis (%): calcd for  $\text{C}_{12}\text{H}_6\text{N}_{12}\text{O}_6$  (414.05): C 34.79, H 1.46, N 40.57; Found: C 35.06, H 1.66, N 39.75.

**Preparation of 2,3,4,6-tetra-1H- triazol-1-yl-1,3-dinitrobenzene (4):** To a round-bottomed flask fitted with a reflux condenser, is added 0.5 mmol 2,4,6-trifluoro-1,3,5-trinitrobenzene in 15 mL benzene under dinitrogen, and 2.25 mmol 1-trimethylsilyltriazole was added drop wise slowly. The reaction mixture was allowed to stir at room temperature overnight, the mixture was filtered, and washed with  $\text{CH}_2\text{Cl}_2$  three times ( $3 \times 5$  mL) to give the crude product. The crude product was purified by silica gel column chromatography. The first product was isolated using hexane-ethyl acetate (1:1) as eluent to give **3f** and the second product was isolated to give **4**.

2,4,6-tri-1H- triazol-1-yl-1,3,5-trinitrobenzene (**3f**): Yield 30%;

2,3,4,6-tetra-1H- triazol-1-yl-1,3-dinitrobenzene (**4**): Yield 50%; white solid; IR (KBr):  $\tilde{\nu}$  = 3115, 1773, 1558, 1508, 1335, 1276, 990, 665  $\text{cm}^{-1}$ ; Mp. (DSC) 228 °C (decomposition);  $^1\text{H}$  NMR ( $\text{CD}_3\text{CN}$ ):  $\delta$  = 8.74 (s, 1H), 8.24 (s, 3H), 8.17 (s, 1H), 8.10 (s, 2H), 8.03 (s, 1H); C,H,N analysis (%): calcd for  $\text{C}_{14}\text{H}_8\text{N}_{14}\text{O}_4$  (436.90): C 38.54, H 1.85, N 44.94; Found: C 38.38, H 1.71, N 44.60.

**Preparation of 2,4,6-tri-1H- triazol-1-yl-3,5-dinitrophenol silver coordination complex, [Ag(TTDP)(H<sub>2</sub>O)], **6**, and 2,3,4,6-tetra-1H- tridazol-1-yl-1,3-dinitrobenzene silver dinitramide coordination complex, [Ag(TTDB)(CH<sub>3</sub>CN)][N(NO<sub>2</sub>)<sub>2</sub>], **7**.** To a round-bottomed flask, is added 0.2 mmol 2,4,6-tri-1H- triazol-1-yl-1,3,5-trinitrobenzene, **3f**, or **4** and 0.2 mmol silver dinitramide in 30 mL acetonitrile-methanol (2:1). The solvent was slowly evaporated at room temperature after one week to give crystals.

[Ag(TTDP)(H<sub>2</sub>O)] (**6**): Yield 35%; red crystal; IR (KBr):  $\tilde{\nu}$  = 3435, 3126, 2361, 1614, 1552, 1392, 1130, 881 cm<sup>-1</sup>; Mp. (DSC) 293 °C (decomposition); <sup>1</sup>H NMR (CD<sub>3</sub>CN):  $\delta$  = 8.96 (s, 2H), 8.53 (s, 1H), 7.99 (s, 1H), 7.97 (s, 2H); C,H,N analysis (%): calcd for C<sub>12</sub>H<sub>8</sub>AgN<sub>11</sub>O<sub>6</sub> (436.09): C 28.25, H 1.58, N 30.20; Found: C 28.26, H 1.59, N 28.56.

[Ag(TTDB)(CH<sub>3</sub>CN)][N(NO<sub>2</sub>)<sub>2</sub>] (**7**): Yield 55%; yellow crystal; IR (KBr):  $\tilde{\nu}$  = 3430, 3126, 2270, 1562, 1519, 1277, 1187, 987 cm<sup>-1</sup>; Mp. (DSC) 164 °C (decomposition); <sup>1</sup>H NMR (CD<sub>3</sub>CN):  $\delta$  = 7.56 (br, 8H); C,H,N analysis (%): calcd for C<sub>16</sub>H<sub>11</sub>AgN<sub>18</sub>O<sub>8</sub> (690.01): C 27.80, H 1.60, N 36.47; Found: C 27.02, H 1.44, N 35.95.

## Part B: DSC data for 3a-f, 4, 6, 7.

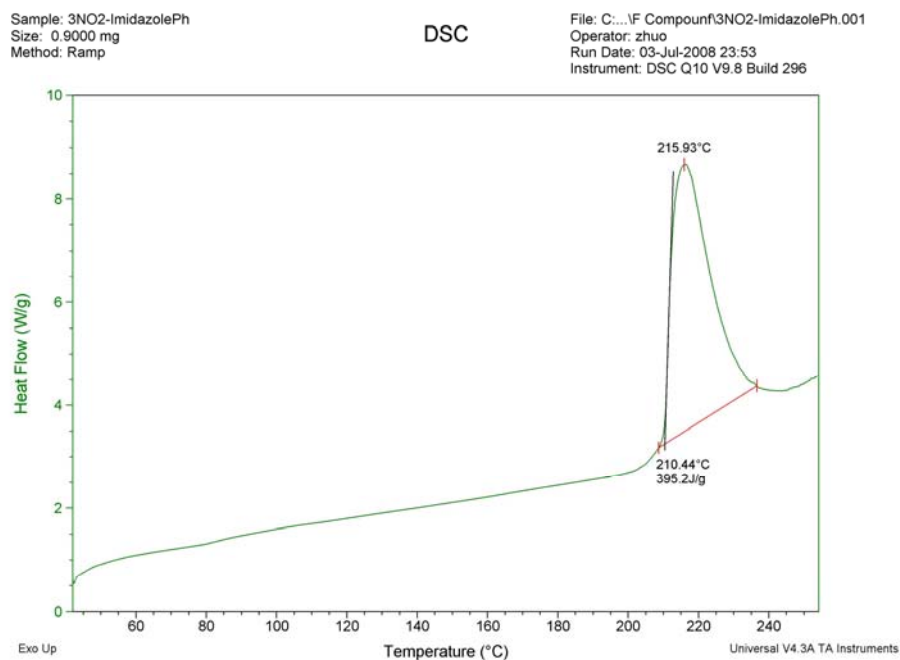

Figure B-1. Differential scanning calorimeter (DSC) figure for 2-1H- imidazol-1-yl-1,3,5-trinitrobenzene (3a).

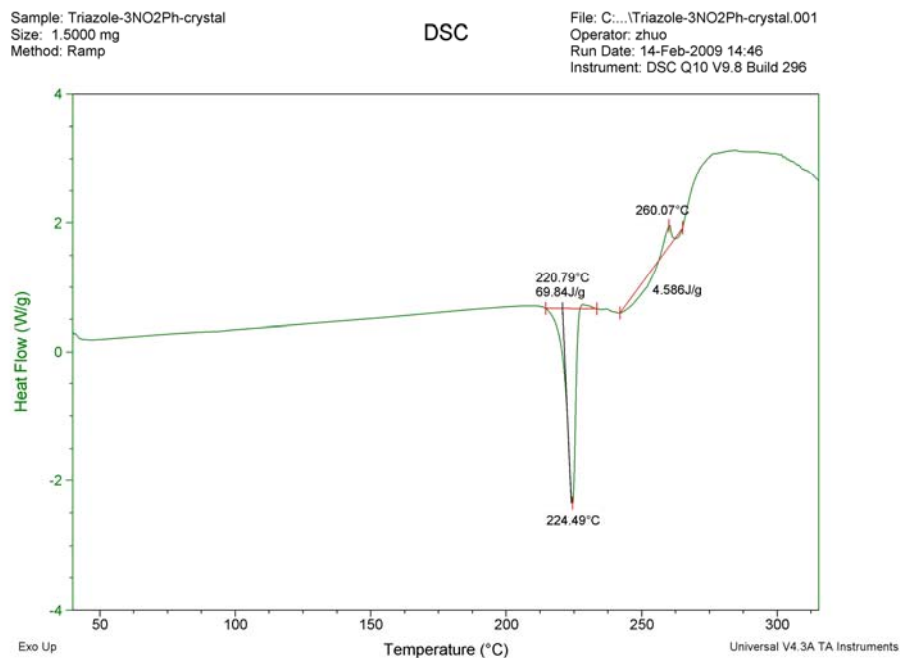

Figure B-2. Differential scanning calorimeter (DSC) figure for 2-1H- triazol-1-yl-1,3,5-trinitrobenzene (3b)

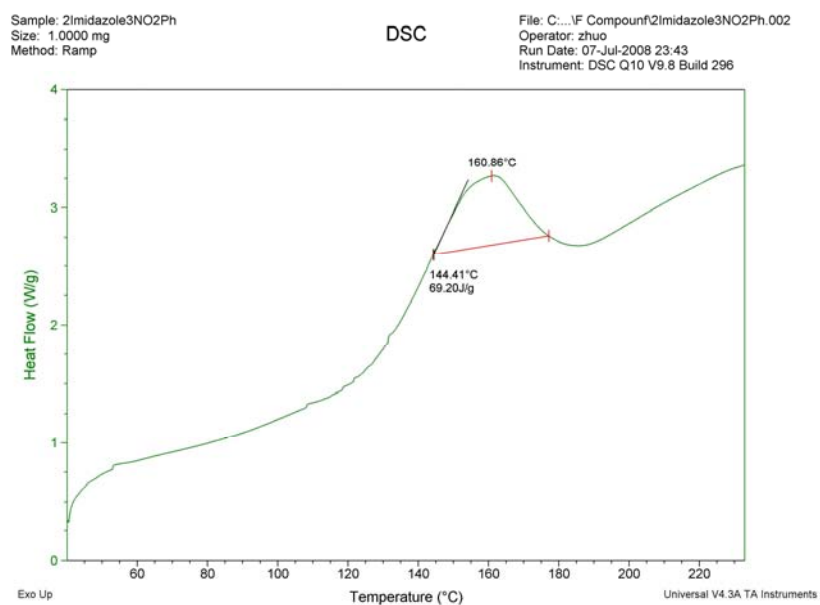

Figure B-3. Differential scanning calorimeter (DSC) figure for 2,4-di-1H- imidazol-1-yl-1,3,5-trinitrobenzene (3c)

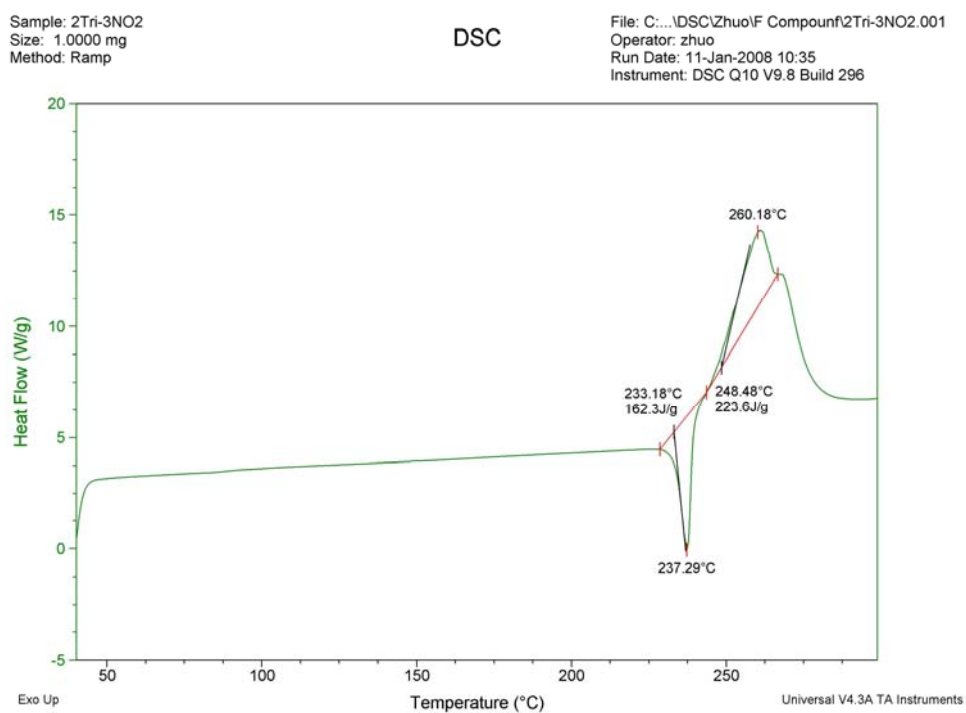

Figure B-4. Differential scanning calorimeter (DSC) figure for 2,4-di-1H- triazol-1-yl-1,3,5-trinitrobenzene (3d)

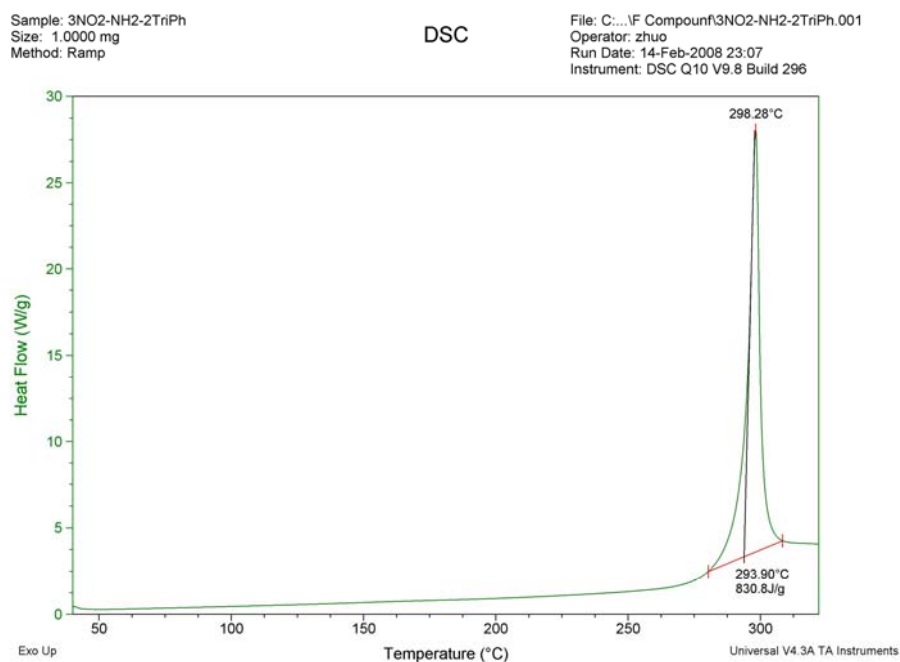

**Figure B-5. Differential scanning calorimeter (DSC) figure for  
1-Amino-3,5-di-1H-1,2,4-triazolylnitrobenzene (3e)**

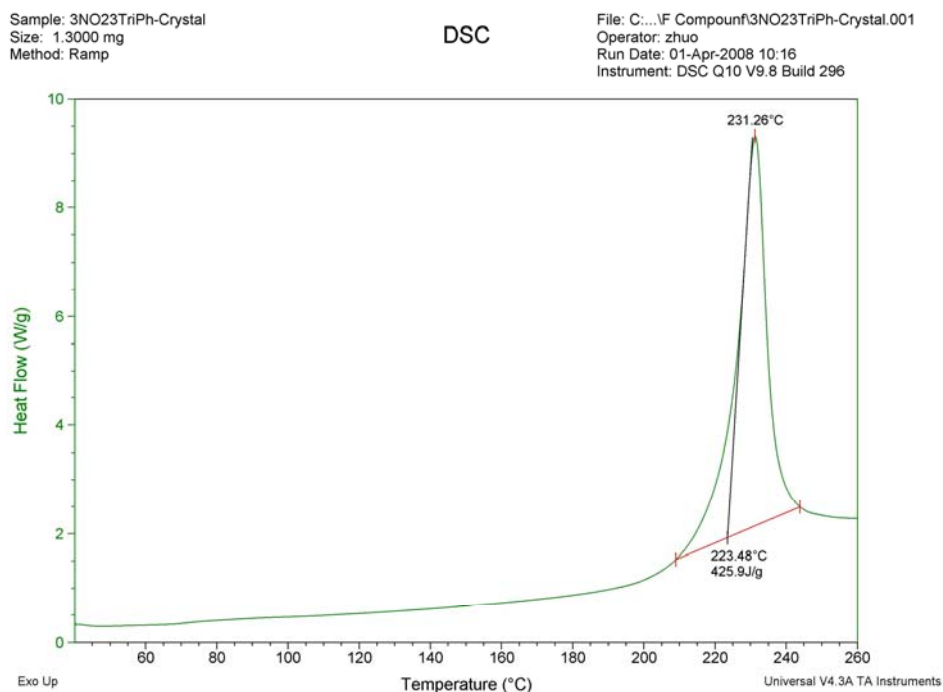

**Figure B-6. Differential scanning calorimeter (DSC) figure for 2,4,6-tri-1H- triazol-1-yl-1,3,5-trinitrobenzene  
(3f)**

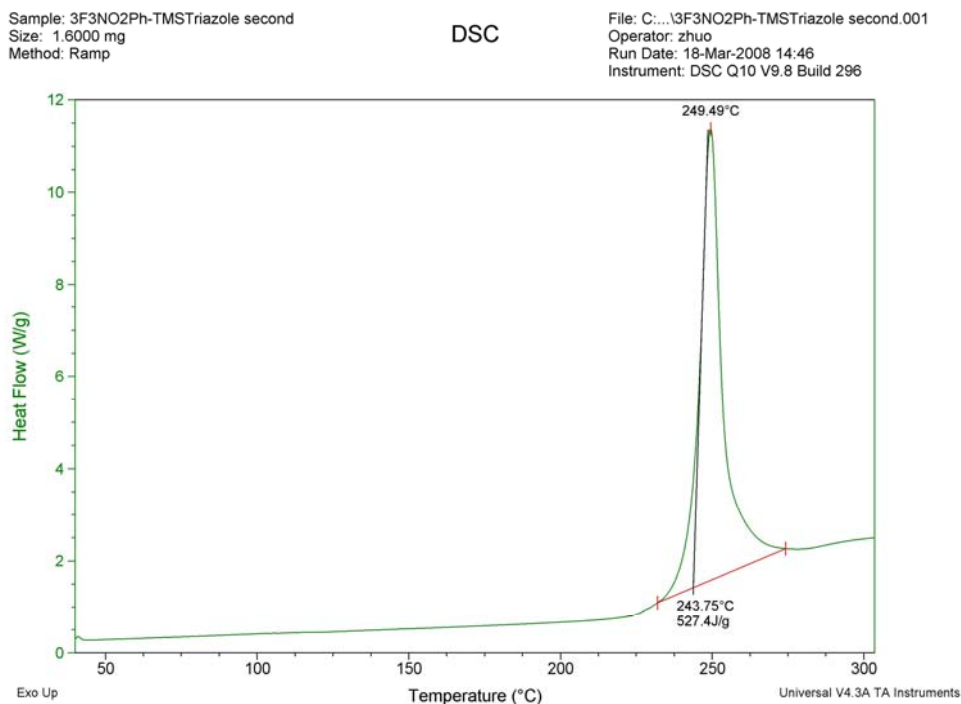

Figure B-7. Differential scanning calorimeter (DSC) figure for 2,3,4,6-tetra-1H- triazol-1-yl-1,3-dinitrobenzene (4)

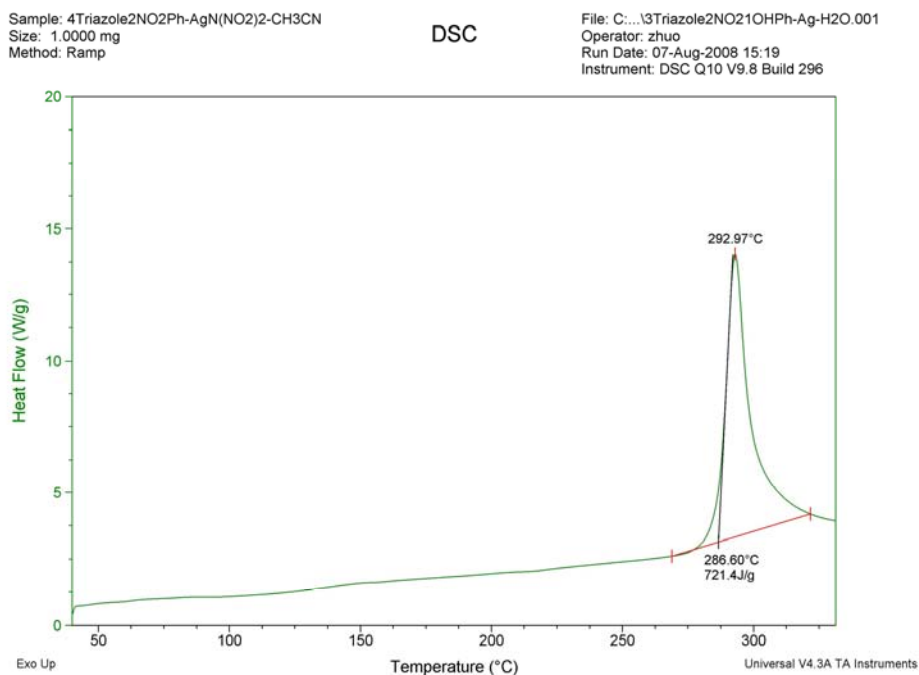

Figure B-8. Differential scanning calorimeter (DSC) figure for 2,4,6-tri-1H- triazol-1-yl-3,5-dinitrophenol silver coordination complex, [Ag(TTDP)(H<sub>2</sub>O)] (6)



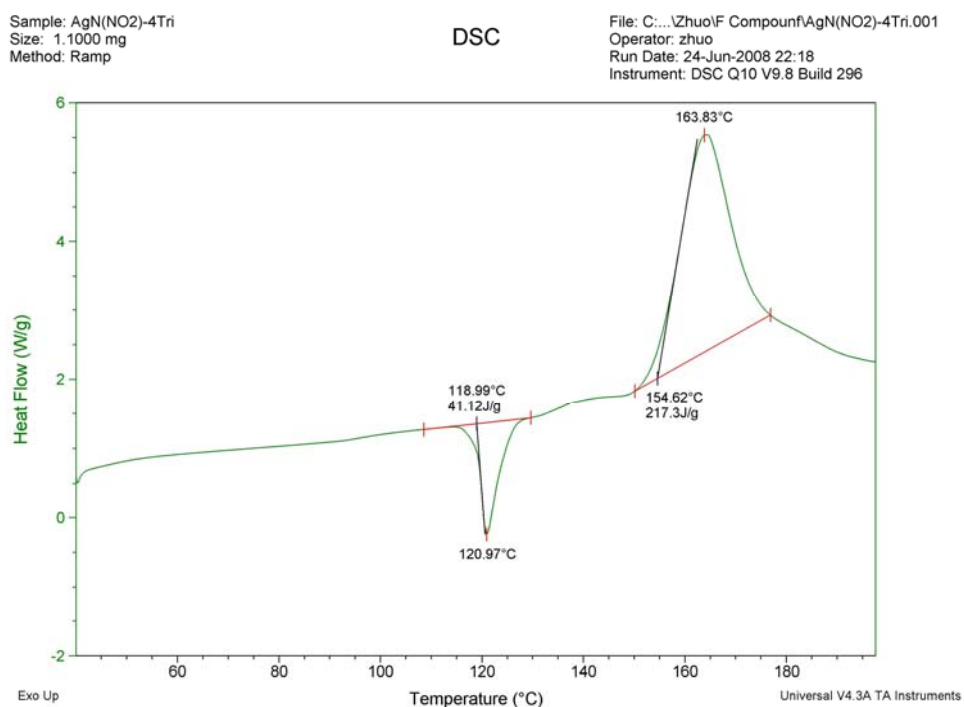

**Figure B-9. Differential scanning calorimeter (DSC) figure for 2,3,4,6-tetra-1H-triazol-1-yl-1,3-dinitrobenzene silver dinitramide coordination complex, [Ag(TTDB)(CH<sub>3</sub>CN)][N(NO<sub>2</sub>)<sub>2</sub>], 7**

**Part C: Crystallographic Data and Structure Refinement Parameters of compound 3e, 3f, 6, 7.** CCDC 732611 (3e), 732612 (3f), 732613 (6), 732614 (7) contains the supplementary crystallographic data for this paper. These data can be obtained free of charge from the Cambridge Crystallographic Data Center via [www.ccdc.cam.ac.uk/data\\_request/cifa](http://www.ccdc.cam.ac.uk/data_request/cifa)

C-1. The Crystallographic Data and Refinement Parameters of compound 3e, 3f, 6, 7.

#### **X-Ray Crystallography. Experimental**

Crystals of compound **3e**, **3f**, **6** and **7** were removed from the flask, a suitable crystal was selected, attached to a glass fiber and data were collected at 90(2) K using a Bruker/Siemens SMART APEX instrument (Mo K $\alpha$  radiation,  $\lambda = 0.71073$  Å) equipped with a Cryocool NeverIce low temperature device. Data were measured using omega scans 0.3° per frame for 5 seconds, and a full sphere of data was collected. A total of 2400 frames were collected with a final resolution of 0.77 Å for **3e** and 0.83 Å for **3f**, **6** and **7**. Cell parameters were retrieved using SMART<sup>2</sup> software and refined using SAINTPlus<sup>3</sup> on all observed reflections. Data reduction and correction for Lp and decay were performed using the SAINTPlus software. Absorption corrections were applied using SADABS.<sup>4</sup>

Data for **3f** were rotationally twinned and were deconvoluted using CELL\_NOW<sup>5</sup> giving a two component twin relationship: 179.9° rotation about the reciprocal axis 1.000, 0.000, -0.001, with a refined twinning ratio of 0.3122(9). The matrix used to relate the second orientation to the first domain is: (1.000, 0.001, 0.037, 0.000, -1.000, 0.001, -0.003, -0.004, -1.000). Each cell component was refined using SAINTPlus on all observed reflections. Absorption corrections were applied using TWINABS.<sup>6</sup>

All structure were solved by direct methods and refined by least squares method on F<sup>2</sup> using the SHELXTL<sup>7</sup> program package. Structures were solved in the space group P2(1)/c (# 14: **3e** and **3f**), C2/c (#15) and P-1 (#2: **7**) by analysis of systematic absences. Hydrogen atoms were added geometrically (riding model) unless stated below. All non-hydrogen atoms were refined anisotropically except in **7**; the solvent acetonitrile group was disordered in three positions, 41:39:20%, and these atoms were held isotropic with some geometrical restraints. In **6**, the solvent water molecules in the central voids were located but hydrogen atoms could not be located. They are included in the formula and weight. No decomposition was observed during data collection. Details of data collections and refinements are given in Table 1.

**Table 1.** Crystal Data and Structure Refinement Parameters for Compounds **3e-7**.

|                                                            | <b>3e</b>                                                     | <b>3f</b>                                                     | <b>6</b>                                                         | <b>7</b>                                                         |
|------------------------------------------------------------|---------------------------------------------------------------|---------------------------------------------------------------|------------------------------------------------------------------|------------------------------------------------------------------|
| Formula                                                    | C <sub>12</sub> H <sub>9</sub> N <sub>11</sub> O <sub>6</sub> | C <sub>12</sub> H <sub>6</sub> N <sub>12</sub> O <sub>6</sub> | C <sub>12</sub> H <sub>12</sub> AgN <sub>11</sub> O <sub>8</sub> | C <sub>16</sub> H <sub>11</sub> AgN <sub>18</sub> O <sub>8</sub> |
| CCDC no.                                                   | 732611                                                        | 732612                                                        | 732613                                                           | 732614                                                           |
| Fw                                                         | 403.30                                                        | 414.29                                                        | 546.20                                                           | 691.30                                                           |
| Crystal size (mm <sup>3</sup> )                            | 0.34x0.29x0.24                                                | 0.60x0.50x0.08                                                | 0.40x0.36x0.30                                                   | 0.20 x 0.20 x 0.05                                               |
| Crystal system                                             | monoclinic                                                    | monoclinic                                                    | monoclinic                                                       | triclinic                                                        |
| Space group                                                | P2(1)/c                                                       | P2(1)/c                                                       | C2/c                                                             | P-1                                                              |
| a (Å)                                                      | 9.6692(4)                                                     | 12.2582(17)                                                   | 20.041(3)                                                        | 8.8611(4)                                                        |
| b (Å)                                                      | 9.4624(4)                                                     | 10.7107(15)                                                   | 8.2412(8)                                                        | 11.1986(5)                                                       |
| c (Å)                                                      | 19.0356(8)                                                    | 24.007(3)                                                     | 24.046(3)                                                        | 13.3871(6)                                                       |
| a (°)                                                      | -                                                             | -                                                             | -                                                                | 78.4787(6)                                                       |
| b (°)                                                      | 97.696(1)                                                     | 92.253(2)                                                     | 111.131(9)                                                       | 74.2808(6)                                                       |
| g (°)                                                      | -                                                             | -                                                             | -                                                                | 84.8365(7)                                                       |
| V (Å <sup>3</sup> )                                        | 1725.95(13)                                                   | 3149.5(7)                                                     | 3704.4(8)                                                        | 1252.07(10)                                                      |
| Z                                                          | 4                                                             | 8                                                             | 8                                                                | 2                                                                |
| D <sub>c</sub> (g cm <sup>-3</sup> )                       | 1.552                                                         | 1.747                                                         | 1.959                                                            | 1.834                                                            |
| μ (mm <sup>-1</sup> )                                      | 0.128                                                         | 0.145                                                         | 1.162                                                            | 0.889                                                            |
| T (K)                                                      | 90(2)                                                         | 90(2)                                                         | 90(2)                                                            | 90(2)                                                            |
| λ <sub>MoKα</sub> (Å)                                      | 0.71073                                                       | 0.71073                                                       | 0.71073                                                          | 0.71073                                                          |
| Reflections collected                                      | 25293                                                         | 72957                                                         | 27473                                                            | 18562                                                            |
| R(int)                                                     | 0.0386                                                        | 0.0423                                                        | 0.0342                                                           | 0.0354                                                           |
| Data/restraints/parameters                                 | 3967/0/263                                                    | 7224/0/542                                                    | 3333 / 0 / 290                                                   | 5758/6/398                                                       |
| GOOF on F <sup>2</sup>                                     | 1.083                                                         | 1.055                                                         | 1.082                                                            | 1.071                                                            |
| R <sub>1</sub> (I > 2σ(I)) <sup>a</sup>                    | 0.0371                                                        | 0.0382                                                        | 0.0336                                                           | 0.0341                                                           |
| wR <sub>2</sub> (I > 2σ(I)) <sup>b</sup>                   | 0.0932                                                        | 0.0864                                                        | 0.0863                                                           | 0.0761                                                           |
| R (all data)                                               | 0.0436                                                        | 0.0446                                                        | 0.0372                                                           | 0.0421                                                           |
| wR (all data)                                              | 0.0975                                                        | 0.0909                                                        | 0.0886                                                           | 0.0802                                                           |
| Δρ <sub>min</sub> and ρ <sub>max</sub> (e/Å <sup>3</sup> ) | 0.337 and -0.225                                              | 0.313<br>-0.273                                               | and 0.954<br>-0.819                                              | and 0.897 and -0.404                                             |

$$^a R = \sum ||F_o| - |F_c|| / \sum |F_o|. \quad ^b wR = [\sum w(F_o^2 - F_c^2)^2 / \sum w(F_o^2)^2]^{1/2}.$$

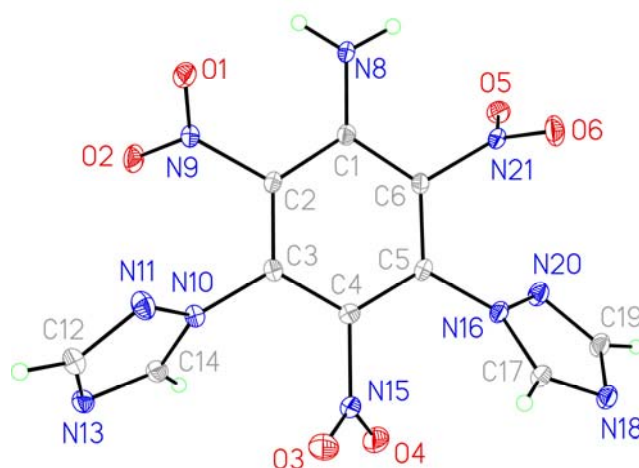

**Figure C1-1.** Structure of **3e** (displacement ellipsoids shown at 30% probability). Hydrogen atoms represented by spheres of arbitrary radius.

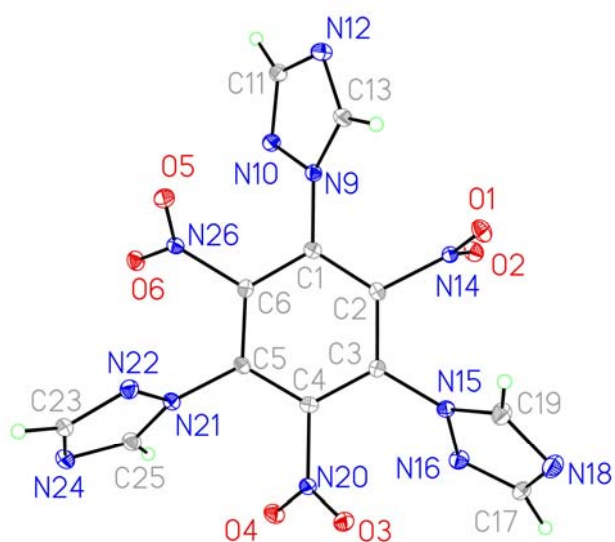

**Figure C1-2.** Structure of one of the unique molecule in the asymmetric unit of **3f** (displacement ellipsoids shown at 30% probability). Hydrogen atoms represented by spheres of arbitrary radius.

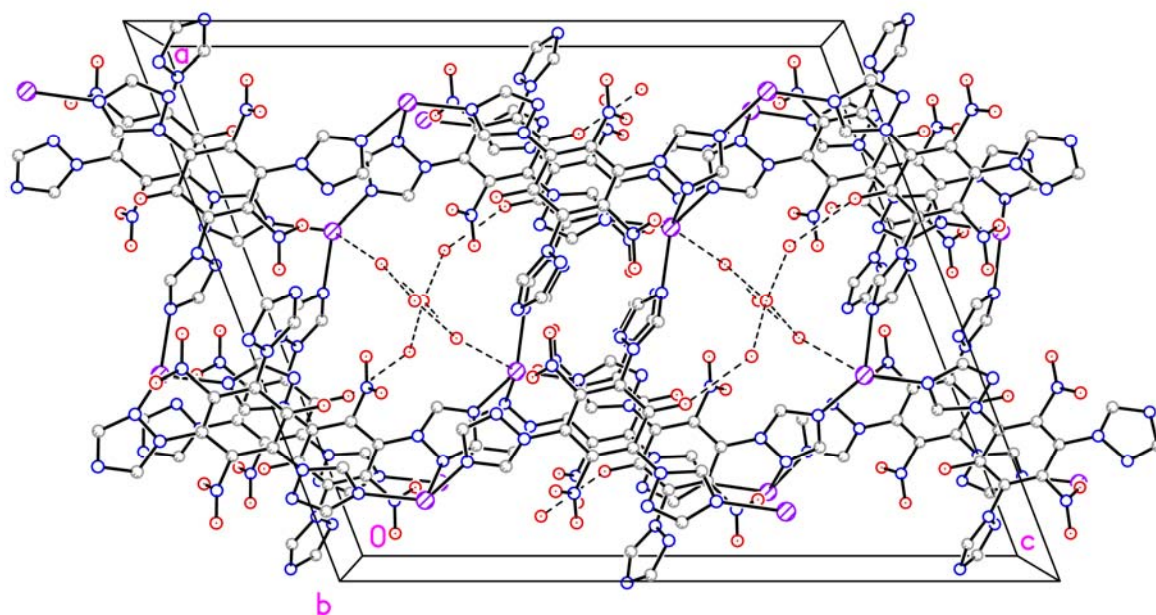

**Figure C1-3.** Packing diagram of **6** showing the honeycomb voids along the b-axis. Hydrogen atoms omitted for clarity. Dashed lines indicate close contacts.

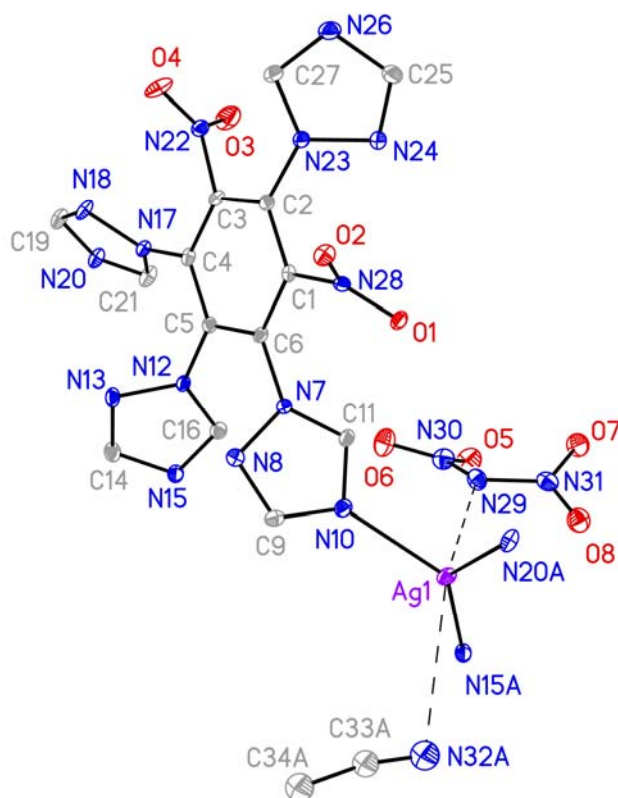

**Figure C1-4.** Structure of **7** (displacement ellipsoids shown at 30% probability). Hydrogen atoms omitted for clarity. Dashed lines indicate filled coordination sites by solvent (highest occupancy site shown) and dinitramide. Symmetry generated coordination atoms N15a and N20a also shown.

### Structure Description:

The structure of the precursor molecules **3e** and **3f** are shown in Figures C2-1 and C2-2. Both crystallize in the monoclinic P2(1)/c system. **3e** has a solvent acetonitrile molecule co-crystallized in the lattice and in **3f** there are two crystallographically independent precursor molecules in the asymmetric unit. In **3e**, only the amino group is essentially coplanar to the ring system – all the other substituents form dihedrals ranging from 49.8° (N16-N20) to 72.3° (N21-O3) to the central ring. The amino group forms the basis of a rectangular hydrogen bonding synthon which binds **3e** into a corrugated sheet parallel to the ac plane. The solvent acetonitrile groups fill the void (void dimensions are ca. 8.9 x 9.6 Å) with a partial overlap of these voids across each corrugated sheet. The central ring in **3f** is fully nitrated, and in spite of close contacts, there are no classic H-bonding interactions. Due to the steric requirements of the nitrates and imidazoles there are a range of dihedral angles between each substituent and the central ring which gives rise to two crystallographically independent molecules in the asymmetric unit. Although not associated by hydrogen bonding, **3f** also packs in a corrugated fashion (parallel to the ac face also) albeit with a greater peak to peak amplitude. Extra figures and dihedral angle tables are given in the Supporting Information file. The reaction with AgN(NO<sub>2</sub>)<sub>2</sub> to create dinitramide salts of **3f** and **4** led to the synthesis and isolation the unexpected product 2,4,6-tri-1H- triazol-1-yl-3,5-dinitrophenol silver monohydrate, [Ag(TTDP)(H<sub>2</sub>O)], **6** and the desired 2,3,4,6-tetra-1H- triazol-1-yl-1,3-dinitrobenzene silver dinitramide coordination complex, [Ag(TTDB)(CH<sub>3</sub>CN)][N(NO<sub>2</sub>)<sub>2</sub>], **7**. In **6** a complex honeycomb structure is formed with each Ag four coordinate (Ag1-N = 2.285 - 2.414). The phenolic O<sup>-</sup> is stabilized by intra molecular H-bonding (C11-H11...O1 = 2.699(4)Å) and possibly by the solvent H<sub>2</sub>O molecules. However the location of the hydrogen atoms associated with these water molecules presently cannot be determined. These solvent molecules lie in the honeycomb cavities which are oriented parallel to the b-axis as shown in Figure C2-4. However the more nitrogen containing, dinitramide complex **7** is shown in Figure C2-6. The silver atom is 5 coordinate and in a distorted trigonal bipyramid geometry in Figure C2-5. The weakly coordinated solvent acetonitrile was modeled in three major sites with Ag-N distances from 3.38, 2.765 and 2.599Å with occupancies of 41:20:39%. The imidazoles N10, N15 and N20 form the equatorial plane and the dinitramide, and disordered solvent MeCN molecule are the apical components of the coordination geometry (Ag-N = 2.339,

2.231, 2.324, 2.668 and 3.382Å respectively). The extended structure is in the form of an infinite 1D chain along the index (204). Although there are no classic hydrogen bonds there are very weak CH...O and CH...N interactions tying the whole structure into a 3D network.

## C-2. Supporting Information for the Crystallographic Data and Refinement Parameters of compound 3e, 3f, 6, 7.

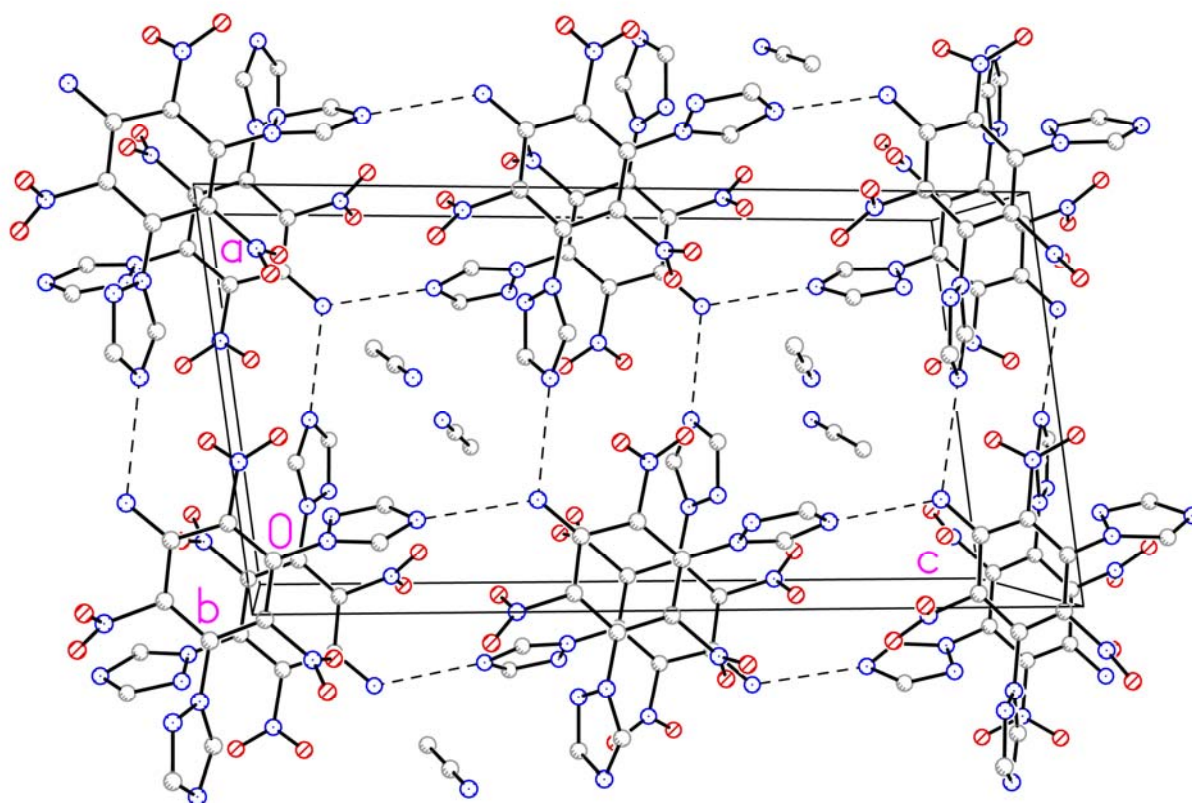

Figure C2-1. Packing Diagram of 3e showing the rectangular voids occupied by MeCN solvent molecules.

Table 2. Dihedral Angles of Substituents in 3e and 3f.

| Cmpd | Substituent | Ring | Angle |
|------|-------------|------|-------|
| 3e   | N9-O2       | C1   | 55.8  |
| 3e   | N10-C14     | C1   | 62.5  |
| 3e   | N15-O4      | C1   | 56.4  |
| 3e   | N16-N20     | C1   | 49.8  |
| 3e   | N21-O6      | C1   | 72.3  |
| 3f   | N9-C13      | C1   | 54.9  |
| 3f   | N4-O2       | C1   | 84.5  |
| 3f   | N15-O19     | C1   | 62.9  |

|    |         |     |      |
|----|---------|-----|------|
| 3f | N20-O4  | C1  | 62.9 |
| 3f | N21-C25 | C1  | 68.6 |
| 3f | N26-O6  | C1  | 58.1 |
| 3f | N32-C36 | C26 | 61.2 |
| 3f | N37-O8  | C26 | 94.6 |
| 3f | N38-C42 | C26 | 53.1 |
| 3f | N43-O10 | C26 | 61.1 |
| 3f | N44-C48 | C26 | 86.1 |
| 3f | N49-O12 | C26 | 55.2 |

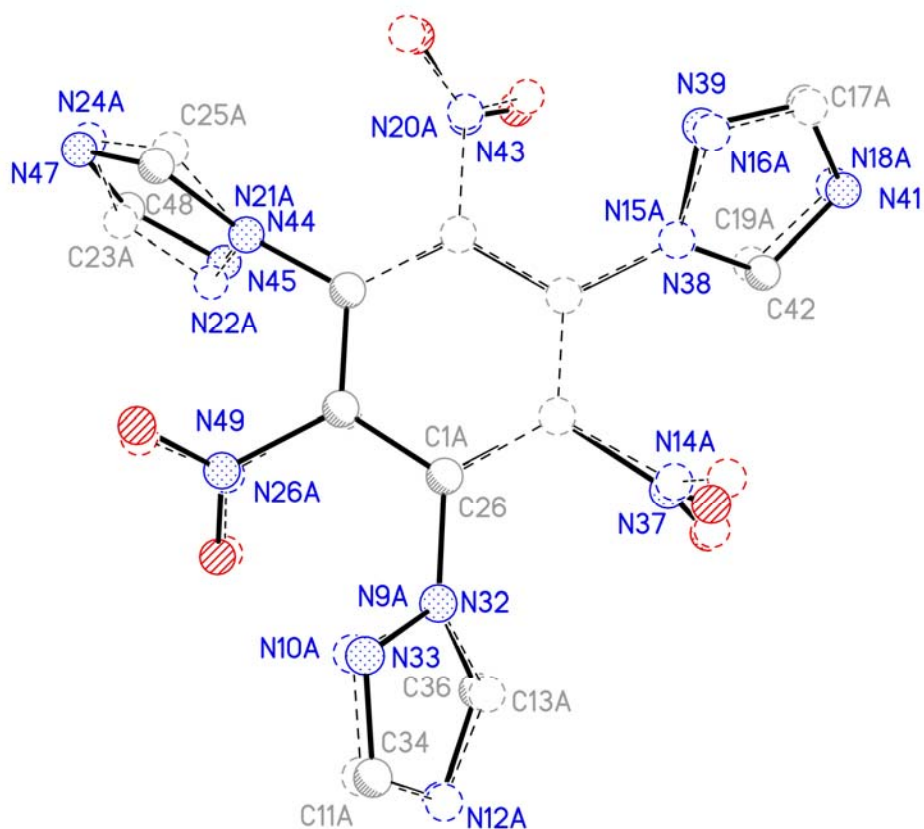

Figure C2-2. Overlay image of both independent molecules in 3f.



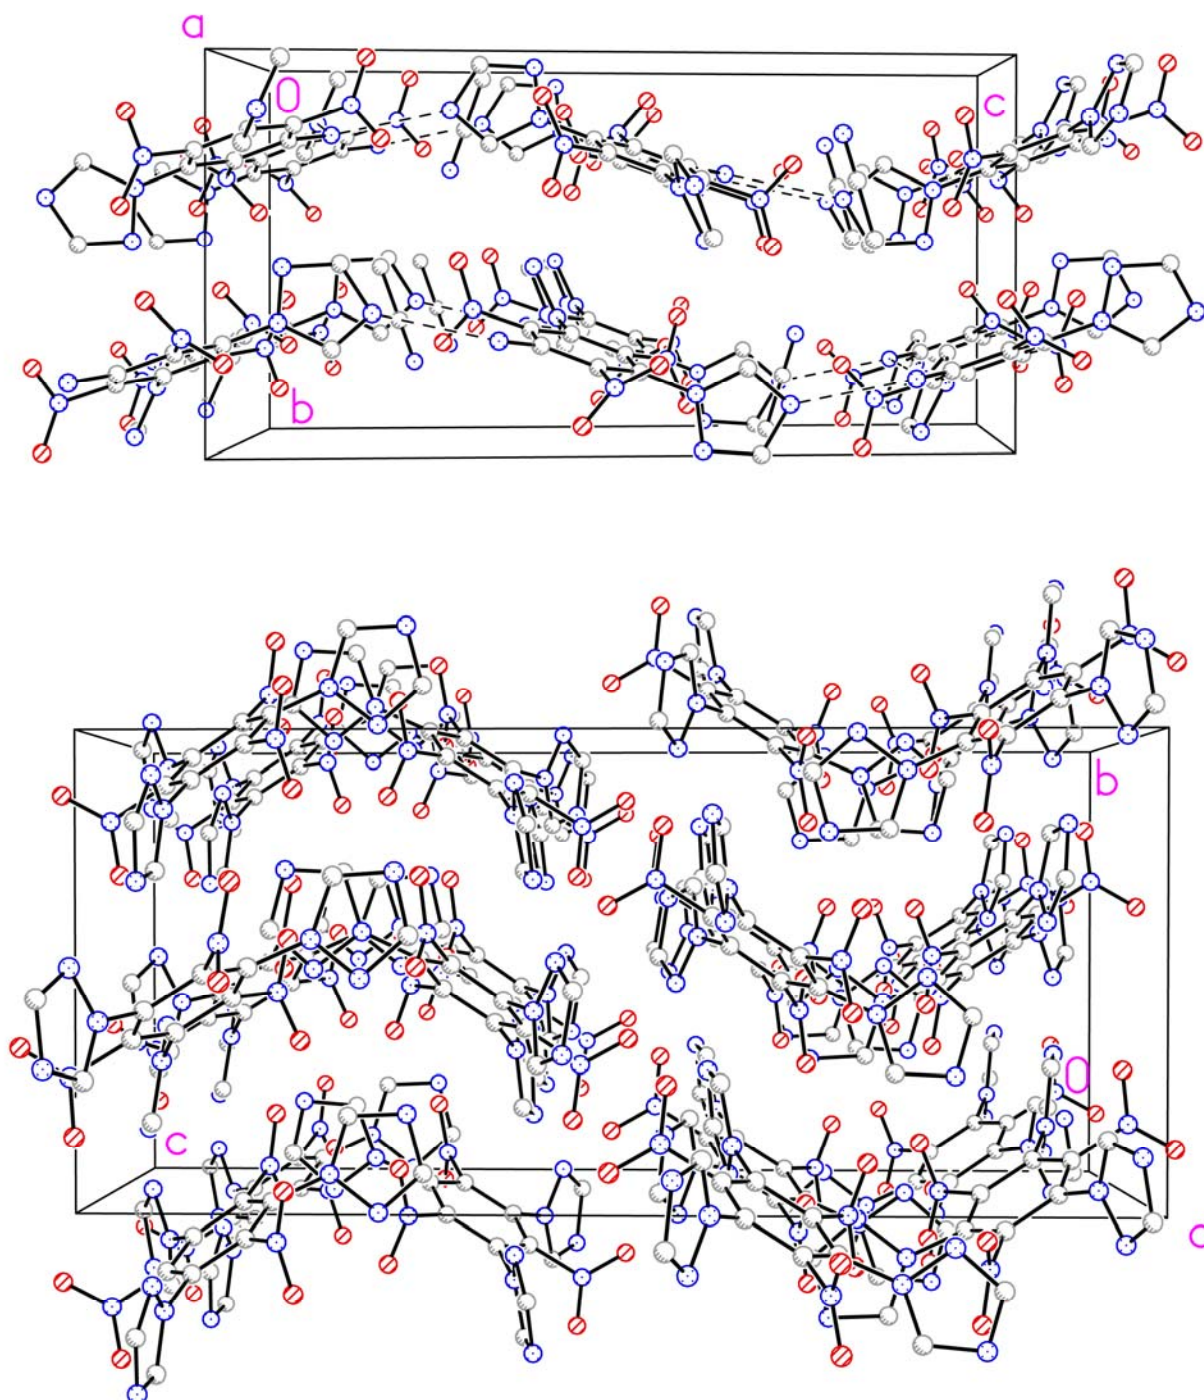

Figure C2-3. Packing diagrams of 3e (top) and 3f (bottom) showing the corrugated packing pattern.

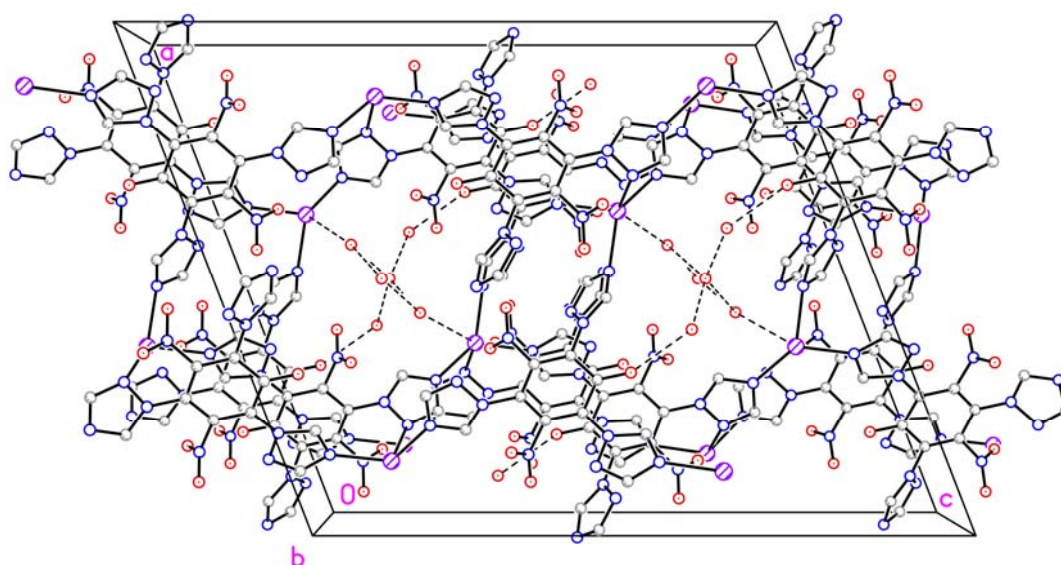

Figure C2-4. Packing diagram of **6** showing the honeycomb voids along the b-axis. Hydrogen atoms omitted for clarity. Dashed lines indicate close contacts.

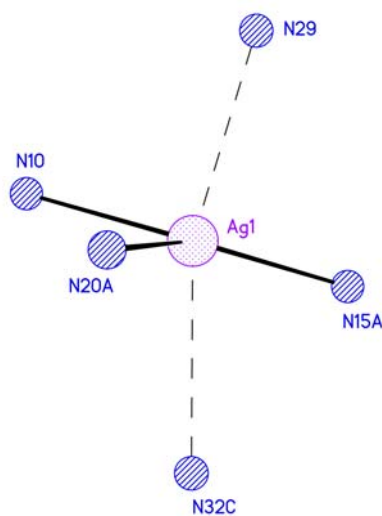

Figure C2-5. Distorted trigonal bipyramidal coordination of **7**. Angles are N10-Ag1-N15a = 130.2°; N15a-Ag1-N20a = 136.8°; N20a-Ag1-N10 = 92.2°; N29-Ag1-N32c = 161.8°.

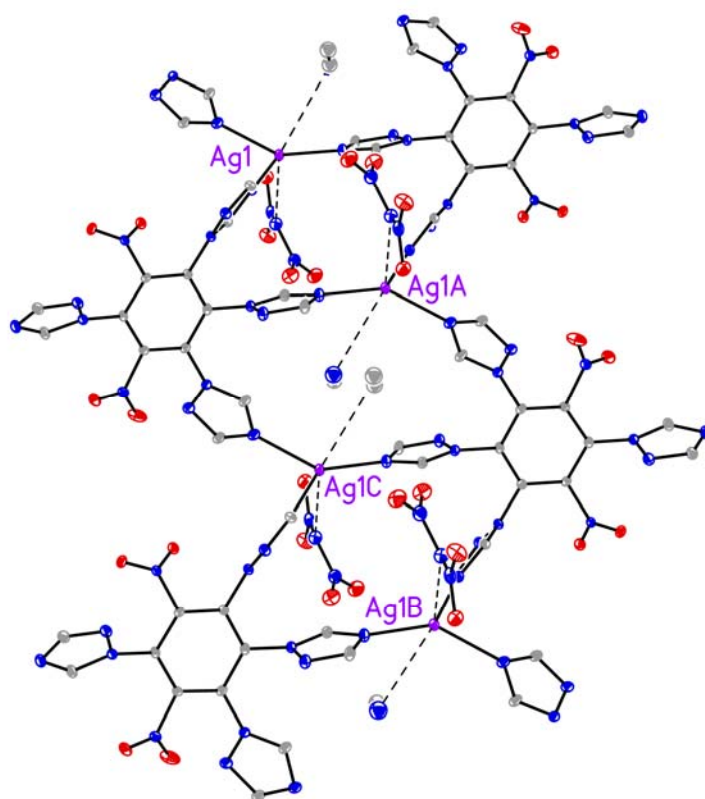

Figure C2-6. Section of the 1D chain in **7** (displacement ellipsoids shown at 30% probability) with the highest occupied solvent molecule position shown. Hydrogen atoms omitted and only silver atoms labeled for clarity.

## Part D: *Ab Initio* computational data

### Theoretical study.

Computations were performed by using the Gaussian03 (Revision D.01) suite of programs. The geometric optimization and the frequency analyses are carried out at the level of Becke three Lee-Yan-Parr (B3LYP) parameters up to 6-31+G(d,p) basis sets.<sup>8</sup> All of the optimized structures were characterized to be true local energy minima on the potential energy surface without imaginary frequencies. The enthalpy of reaction ( $\Delta H_{r,298}^{\circ}$ ) is obtained by combining the MP2/6-311++G\*\* energy difference for the reaction, the scaled zero point energies, and other thermal factors. The heats of formation of the products were determined by using the method of isodesmic reactions (*Scheme 1*). The *Ab Initio* computational data are listed below

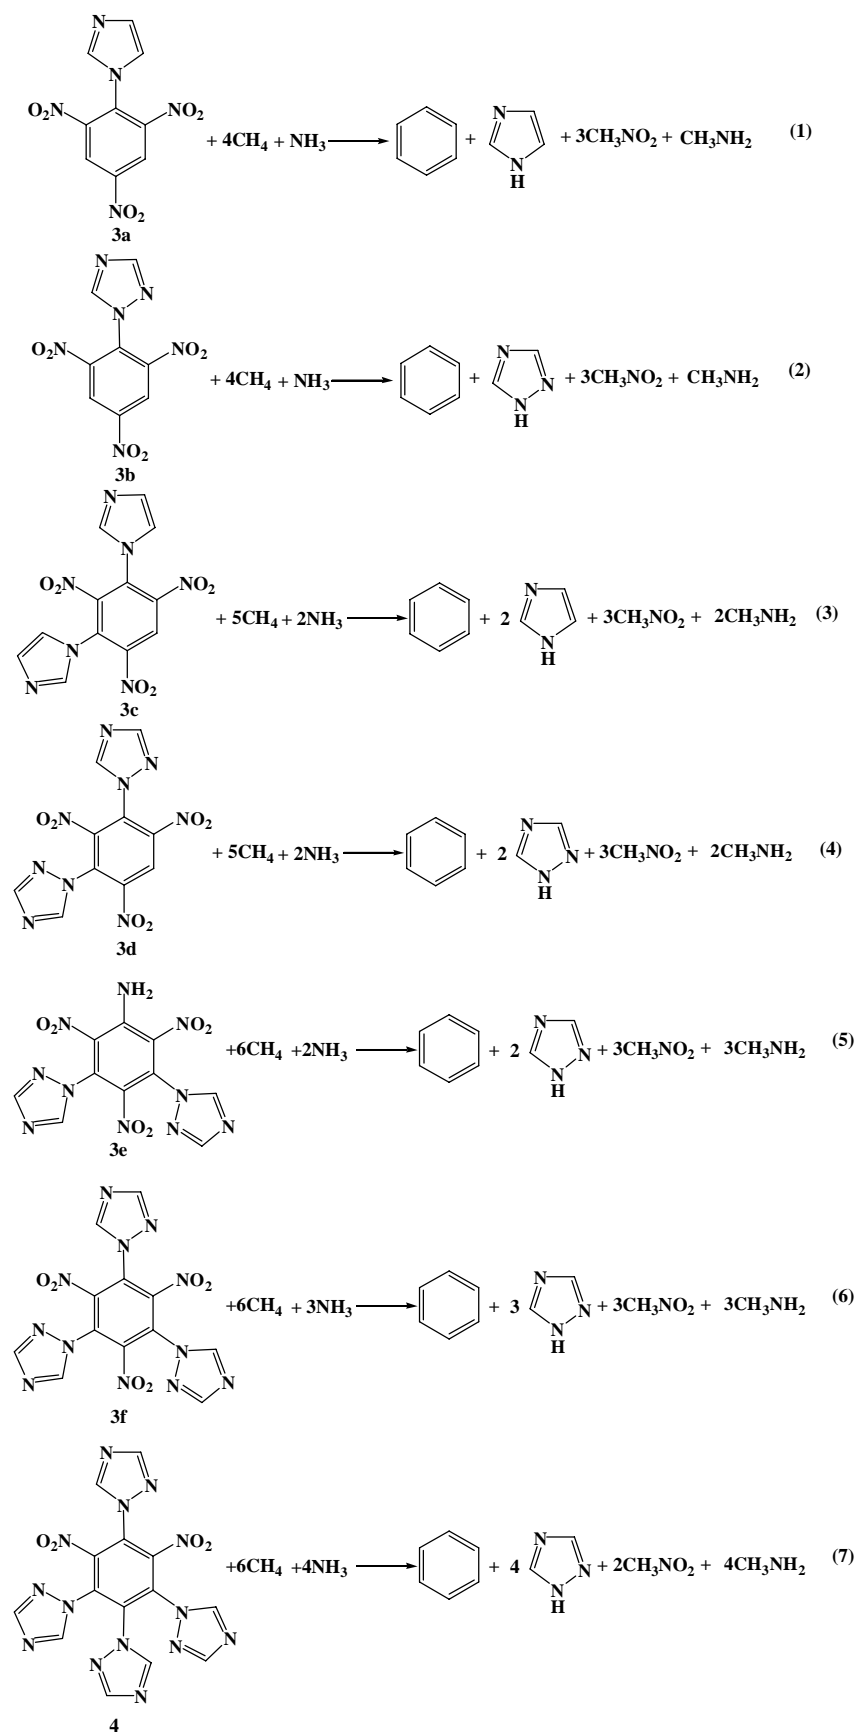

**Scheme 1.** Isodesmic reactions used for calculation of energetic materials.

**TABLE 3.** Calculated (B3LYP/6-31+G\*\*//MP<sub>2</sub>/6-311++G\*\*) Total Energy ( $E_0$ ), Zero-Point Energy (ZPE), Values of Thermal Correction ( $H_T$ ), and Heats of Formation (HOF) of the polyazole polynitrobenzene compound.

| Name                            | $E_0$ (au)    | ZPE(au)  | $H_T$ (au) | HOF(kJ/mol)            |
|---------------------------------|---------------|----------|------------|------------------------|
| <b>3a</b>                       | -1068.335478  | 0.157492 | 0.017204   | 167.6                  |
| <b>3b</b>                       | -1084.35972   | 0.146352 | 0.016823   | 361.8                  |
| <b>3c</b>                       | -1292.7848312 | 0.207794 | 0.021441   | 223.5                  |
| <b>3d</b>                       | -1324.8321837 | 0.185434 | 0.02069    | 476.4                  |
| <b>3e</b>                       | -1380.069408  | 0.202561 | 0.21831    | 651.82                 |
| <b>3f</b>                       | -1565.2985357 | 0.222691 | 0.023139   | 737.1                  |
| <b>4</b>                        | -1601.7038694 | 0.261998 | 0.025696   | 920.2                  |
| 1,2,4-triazole                  | -241.6632438  | 0.059886 | 0.004507   | 190.3 <sup>[10]</sup>  |
| CH <sub>4</sub>                 | -40.3796224   | 0.044793 | 10.0       | -74.6 <sup>[10]</sup>  |
| benzene                         | -231.5842377  | 0.100451 | 0.005346   | 82.9 <sup>[10]</sup>   |
| NH <sub>3</sub>                 | -56.4154647   | 0.034384 | 0.003819   | -45.9 <sup>[10]</sup>  |
| CH <sub>3</sub> NH <sub>2</sub> | -95.59384     | 0.06403  | 0.00438    | -23 <sup>[10]</sup>    |
| CH <sub>3</sub> NO <sub>2</sub> | -118.76734    | 0.10328  | 0.005298   | -103.8 <sup>[10]</sup> |

**Geometry Coordinates**

B3LYP/6-31+G(d,p) optimized geometries (Å)

2-1H- imidazol-1-yl-1,3,5-trinitrobenzene (**3a**)

|   |             |             |             |
|---|-------------|-------------|-------------|
| C | -0.49002000 | 0.07890500  | -0.03709500 |
| C | 0.32524000  | 1.22733100  | -0.01970600 |
| C | 1.71417700  | 1.16347600  | -0.01459600 |
| C | 2.31530600  | -0.08814700 | -0.03824000 |
| C | 1.57167100  | -1.26290100 | -0.03767800 |

|   |             |             |             |
|---|-------------|-------------|-------------|
| C | 0.18795600  | -1.15541500 | -0.05274000 |
| H | 2.31221900  | 2.06548100  | 0.02641200  |
| H | 2.05889000  | -2.23022600 | -0.03400300 |
| N | -0.26680200 | 2.57855900  | 0.03971900  |
| O | -1.14240900 | 2.84439600  | -0.77756300 |
| O | 0.18875100  | 3.34027700  | 0.88850400  |
| N | -0.57221500 | -2.42537800 | -0.12255700 |
| O | -1.41897500 | -2.52092500 | -1.00209400 |
| O | -0.25813300 | -3.29628200 | 0.68510600  |
| N | 3.79173400  | -0.17418800 | -0.04366200 |
| O | 4.28741300  | -1.29801900 | -0.03686800 |
| O | 4.41517100  | 0.88399100  | -0.05505100 |
| N | -1.89356400 | 0.13044000  | 0.07278000  |
| C | -2.82247800 | 0.49085900  | -0.89735600 |
| H | -2.51958100 | 0.91222300  | -1.84304000 |
| C | -3.93763900 | -0.30250200 | 0.75864400  |
| H | -4.81311200 | -0.58017200 | 1.32750300  |
| N | -4.04260800 | 0.24492800  | -0.50537200 |
| C | -2.62766200 | -0.40407800 | 1.13629800  |
| H | -2.14808900 | -0.76049900 | 2.03531000  |

2-1H- triazol-1-yl-1,3,5-trinitrobenzene (**3b**)

|   |             |             |             |
|---|-------------|-------------|-------------|
| C | -0.24313900 | -1.17382600 | -0.06898600 |
| C | 0.42268300  | 0.05260000  | -0.06762600 |
| C | -0.33875600 | 1.22726800  | -0.02290600 |
| C | -1.73160400 | 1.17605700  | -0.00969900 |
| C | -2.34877400 | -0.07181000 | -0.01975200 |
| C | -1.63024000 | -1.26074500 | -0.02908700 |
| H | -2.31713100 | 2.08658500  | 0.01095800  |

|   |             |             |             |
|---|-------------|-------------|-------------|
| H | -2.12780900 | -2.22393400 | 0.00789300  |
| N | 0.31356600  | 2.56671600  | -0.01094400 |
| O | -0.27764300 | 3.47578800  | 0.54974800  |
| O | 1.40226300  | 2.66305400  | -0.57393900 |
| N | 0.53586200  | -2.43187600 | -0.14364600 |
| O | 0.02470300  | -3.41401200 | 0.37013600  |
| O | 1.62376500  | -2.35339700 | -0.70851900 |
| N | -3.83757600 | -0.13428200 | -0.01933000 |
| O | -4.34703900 | -1.22289500 | 0.21254400  |
| O | -4.42369000 | 0.92438200  | -0.20631300 |
| N | 1.85606500  | 0.05611100  | 0.02522200  |
| C | 2.74858500  | 0.20797200  | -0.94466900 |
| H | 2.54765600  | 0.40082100  | -1.98827000 |
| C | 3.72958900  | -0.15860200 | 0.98094700  |
| H | 4.51576200  | -0.30574400 | 1.70833100  |
| N | 2.45081000  | -0.20451600 | 1.23707300  |
| N | 3.94799400  | 0.06074200  | -0.36735500 |
| H | 4.84553400  | 0.07516100  | -0.84463300 |

2,4-di-1H- imidazol-1-yl-1,3,5-trinitrobenzene (**3c**)

|   |             |             |             |
|---|-------------|-------------|-------------|
| C | -0.00000800 | -0.54909600 | -0.00000500 |
| C | 1.23962200  | 0.10799600  | -0.00365700 |
| C | 1.19838400  | 1.51326100  | 0.00067100  |
| C | -0.00001600 | 2.21351600  | -0.00001000 |
| C | -1.19841200 | 1.51325200  | -0.00069000 |
| C | -1.23964500 | 0.10798700  | 0.00364200  |
| H | -0.00001900 | 3.29696200  | -0.00001200 |
| N | 2.43294600  | 2.32091900  | 0.03126900  |
| O | 2.45789200  | 3.24899500  | 0.83593600  |



|   |             |             |             |
|---|-------------|-------------|-------------|
| O | 3.32007500  | 2.02422800  | -0.76167900 |
| N | 0.00000600  | -2.03331200 | 0.00000200  |
| O | -0.31844000 | -2.57934000 | 1.04874200  |
| O | 0.31853300  | -2.57934100 | -1.04871300 |
| N | -2.43297600 | 2.32090800  | -0.03130100 |
| O | -3.32007400 | 2.02427400  | 0.76170300  |
| O | -2.45790000 | 3.24900400  | -0.83594500 |
| N | 2.43665800  | -0.63550300 | 0.06371900  |
| C | 3.35423000  | -0.87041400 | -0.95389600 |
| H | 3.26676700  | -0.39245600 | -1.91741400 |
| C | 3.97975700  | -2.05422100 | 0.72629400  |
| H | 4.60468000  | -2.73283800 | 1.28843700  |
| N | -2.43667500 | -0.63551900 | -0.06373100 |
| C | -3.35427100 | -0.87039300 | 0.95387500  |
| H | -3.26684300 | -0.39237800 | 1.91736800  |
| C | -3.97972700 | -2.05430800 | -0.72626600 |
| H | -4.60462400 | -2.73296500 | -1.28838900 |
| N | 4.27961200  | -1.71006900 | -0.57753800 |
| N | -4.27962300 | -1.71008900 | 0.57754000  |
| C | 2.84315300  | -1.42127100 | 1.14759700  |
| H | 2.29871100  | -1.42990400 | 2.07921100  |
| C | -2.84312500 | -1.42135900 | -1.14757200 |
| H | -2.29865100 | -1.43004800 | -2.07916700 |

2,4-di-1H- triazol-1-yl-1,3,5-trinitrobenzene (**3d**)

|   |             |             |             |
|---|-------------|-------------|-------------|
| C | 0.00003600  | -0.54756700 | -0.00003500 |
| C | -1.23431200 | 0.12043400  | 0.02615400  |
| C | -1.19824100 | 1.52535700  | 0.01941100  |
| C | -0.00004900 | 2.22414100  | -0.00003600 |

|   |             |             |             |
|---|-------------|-------------|-------------|
| C | 1.19819000  | 1.52543200  | -0.01950000 |
| C | 1.23434100  | 0.12050200  | -0.02625600 |
| H | -0.00008400 | 3.30722700  | -0.00001400 |
| N | -2.42880200 | 2.33840000  | 0.00387400  |
| O | -2.42614400 | 3.32344800  | -0.72822700 |
| O | -3.34666500 | 1.98826500  | 0.74060300  |
| N | 0.00009400  | -2.03449200 | 0.00001400  |
| O | 0.56766500  | -2.57995700 | -0.93619400 |
| O | -0.56730400 | -2.57994000 | 0.93633900  |
| N | 2.42867800  | 2.33858800  | -0.00388300 |
| O | 3.34658900  | 1.98862000  | -0.74063100 |
| O | 2.42595200  | 3.32352300  | 0.72836800  |
| N | -2.43011900 | -0.62491200 | -0.05744100 |
| C | -3.42549300 | -0.84942200 | 0.85771200  |
| H | -3.48464300 | -0.32924300 | 1.80063700  |
| C | -3.72065400 | -2.09212400 | -0.81513500 |
| H | -4.16638500 | -2.81981600 | -1.47825600 |
| N | 2.43016400  | -0.62481200 | 0.05740100  |
| C | 3.42558700  | -0.84933800 | -0.85769600 |
| H | 3.48473800  | -0.32925200 | -1.80067000 |
| C | 3.72055100  | -2.09215000 | 0.81511000  |
| H | 4.16619800  | -2.81989800 | 1.47822800  |
| N | -2.61230400 | -1.45376300 | -1.13991800 |
| N | -4.25246400 | -1.75924800 | 0.40075800  |
| N | 2.61239800  | -1.45349900 | 1.13999500  |
| N | 4.25231100  | -1.75944400 | -0.40085100 |

1-Amino-3,5-di-1H-1,2,4-triazolyltrinitrobenzene (**3e**)

|   |             |             |             |
|---|-------------|-------------|-------------|
| C | -1.16499000 | -0.18363800 | -0.02345400 |
|---|-------------|-------------|-------------|

|   |             |             |             |
|---|-------------|-------------|-------------|
| C | -1.26058600 | 1.21588300  | -0.03864800 |
| C | -0.11912700 | 2.06441600  | 0.00340200  |
| C | 1.14834300  | 1.40206600  | 0.01737300  |
| C | 1.26973400  | 0.00990800  | 0.01382800  |
| C | 0.10313400  | -0.77125400 | -0.00270100 |
| N | 2.35395900  | 2.23438000  | 0.04067900  |
| O | 2.39116400  | 3.20173500  | -0.72837100 |
| O | 3.24097000  | 1.94000900  | 0.83417800  |
| N | -2.57927200 | 1.83746800  | -0.22412800 |
| O | -3.34185800 | 1.33213500  | -1.03705900 |
| O | -2.81663300 | 2.86776500  | 0.41798600  |
| N | 0.22884700  | -2.23591000 | 0.11491300  |
| O | 0.82611900  | -2.66220700 | 1.09829100  |
| O | -0.28615500 | -2.91540000 | -0.76719800 |
| N | -0.21524600 | 3.40843200  | 0.02071700  |
| H | 0.57982400  | 3.96907700  | -0.24958300 |
| H | -1.11984800 | 3.83383100  | 0.16937700  |
| N | -2.34034300 | -0.95879800 | 0.09511200  |
| C | -2.93541200 | -1.84292100 | -0.76708200 |
| H | -2.46136700 | -2.18661500 | -1.67282300 |
| C | -4.23217000 | -1.45974000 | 0.84522600  |
| H | -5.09618800 | -1.51030500 | 1.49248000  |
| N | 2.52110100  | -0.64851400 | -0.05467800 |
| C | 3.50031000  | -0.84495900 | 0.88315500  |
| C | 3.91243600  | -2.02227000 | -0.81121200 |
| H | 3.50110800  | -0.35346600 | 1.84289200  |
| H | 4.41657200  | -2.70530500 | -1.48004300 |
| N | 2.77855400  | -1.43821900 | -1.15137500 |
| N | 4.39146800  | -1.69313500 | 0.42692200  |
| N | -3.19983500 | -0.69166300 | 1.13520300  |

|   |             |             |             |
|---|-------------|-------------|-------------|
| N | -4.11908800 | -2.18039300 | -0.31254100 |
|---|-------------|-------------|-------------|

2,4,6-tri-1H- triazol-1-yl-1,3,5-trinitrobenzene (**3f**)

|   |             |             |             |
|---|-------------|-------------|-------------|
| C | 0.18467000  | 1.40081300  | -0.00324500 |
| C | -1.09397100 | 0.83958200  | -0.00981200 |
| C | -1.30612900 | -0.54058200 | -0.00320200 |
| C | -0.18071200 | -1.36724600 | -0.01050400 |
| C | 1.12067700  | -0.86090200 | -0.00352400 |
| C | 1.27400200  | 0.52710500  | -0.01021400 |
| N | -0.37451800 | -2.83547200 | 0.03230500  |
| O | -0.43657700 | -3.32540100 | 1.15730100  |
| O | -0.45284400 | -3.41731300 | -1.03547400 |
| N | -2.26850000 | 1.74171000  | 0.03222800  |
| O | -2.66033800 | 2.04344100  | 1.15691800  |
| O | -2.73293100 | 2.09979600  | -1.03591500 |
| N | 2.64247500  | 1.09327600  | 0.03310600  |
| O | 3.18524200  | 1.31794300  | -1.03442800 |
| O | 3.09857300  | 1.28098100  | 1.15836900  |
| N | -2.61468600 | -1.08179800 | 0.00660000  |
| C | -3.42169000 | -1.40596200 | 1.06466200  |
| H | -3.12248200 | -1.27421400 | 2.09508200  |
| C | -4.41987900 | -1.83361600 | -0.73790200 |
| H | -5.18858300 | -2.15661900 | -1.42529600 |
| N | 0.36955800  | 2.80476200  | 0.00680100  |
| C | 0.47294400  | 3.66824100  | 1.06493500  |
| H | 0.41969800  | 3.34569600  | 2.09536700  |
| C | 0.63483300  | 4.74225400  | -0.73750600 |
| H | 0.75161500  | 5.56789800  | -1.42483500 |
| N | 2.24380100  | -1.72336800 | 0.00797500  |

|   |             |             |             |
|---|-------------|-------------|-------------|
| C | 2.93111000  | -2.25372700 | 1.06728300  |
| H | 2.66902400  | -2.05608200 | 2.09728900  |
| C | 3.79706000  | -2.91296900 | -0.73385200 |
| H | 4.46013700  | -3.42002300 | -1.42012900 |
| N | -3.26541700 | -1.36041400 | -1.17112200 |
| N | -4.56267200 | -1.88061700 | 0.62261300  |
| N | 0.47524800  | 3.50485800  | -1.17080500 |
| N | 0.64004500  | 4.89269700  | 0.62299100  |
| N | 2.80821100  | -2.15311000 | -1.16880800 |
| N | 3.91275400  | -3.00540400 | 0.62692500  |

2,3,4,6-tetra-1H- triazol-1-yl-1,3-dinitrobenzene (**4**)

|   |             |             |             |
|---|-------------|-------------|-------------|
| C | 1.70293800  | 0.06848200  | -0.03149700 |
| C | 0.94259700  | 1.23976300  | 0.00503600  |
| C | -0.45893900 | 1.21735300  | 0.03359300  |
| C | -1.12181200 | -0.02350600 | 0.03576900  |
| C | -0.37688100 | -1.22054200 | 0.04377200  |
| C | 1.01823100  | -1.15360800 | 0.00409700  |
| N | 1.79787300  | -2.40773900 | -0.08327900 |
| O | 2.46673200  | -2.56208500 | -1.09746300 |
| O | 1.69576800  | -3.19170100 | 0.85275800  |
| N | 1.64869900  | 2.53470500  | 0.14240200  |
| O | 2.34769700  | 2.89128100  | -0.79641100 |
| O | 1.49412600  | 3.12012800  | 1.20708000  |
| N | 3.11495200  | 0.08656100  | -0.00849300 |
| C | 4.02342900  | 0.50689600  | -0.94506100 |
| C | 5.03574900  | -0.45775100 | 0.62824300  |
| H | 3.73839400  | 1.02783300  | -1.84629000 |
| H | 5.84031100  | -0.85563500 | 1.23014500  |

|   |             |             |             |
|---|-------------|-------------|-------------|
| N | -1.17474200 | 2.42798800  | 0.07256000  |
| C | -2.17979700 | 2.83768900  | 0.90448500  |
| C | -1.70773100 | 4.38832500  | -0.43379700 |
| H | -2.59098100 | 2.21817600  | 1.68815900  |
| H | -1.73388000 | 5.34379000  | -0.93767900 |
| N | -2.53441700 | -0.06830000 | 0.00402800  |
| C | -3.41435800 | -0.65589100 | 0.86924300  |
| C | -4.48073700 | 0.25617100  | -0.69518000 |
| H | -3.10583200 | -1.18942300 | 1.75724000  |
| H | -5.30484900 | 0.58641000  | -1.31118400 |
| N | -1.05138600 | -2.46596600 | -0.01652000 |
| C | -1.19542100 | -3.44832600 | 0.92657000  |
| C | -2.34103300 | -3.93502600 | -0.76977800 |
| H | -0.68602000 | -3.42787300 | 1.87852900  |
| H | -2.99595500 | -4.47777300 | -1.43638300 |
| N | 3.77614400  | -0.56070700 | 1.00856000  |
| N | 5.23687300  | 0.18537300  | -0.56244900 |
| N | -1.80756900 | -2.77843700 | -1.11933400 |
| N | -2.00078100 | -4.38376500 | 0.47723300  |
| N | -0.86371700 | 3.44110200  | -0.79560900 |
| N | -2.53360500 | 4.06660200  | 0.60980500  |
| N | -3.22862700 | 0.52677300  | -1.01591500 |
| N | -4.64729400 | -0.46228400 | 0.45798100  |

## References

1. M. Chaykovsky.; H. G. Adolph. Naval Surface Warfare Center, Silver Spring, Maryland, *Report NSWC/TR-83-22*, **1983**.
2. SMART: v. 5.632, Bruker AXS, Madison, WI, USA, **2005**.
3. SAINTPlus: v. 7.23a, Data Reduction and Correction Program, Bruker AXS, Madison, WI,

USA, **2004**.

4. SADABS: v.2007/4, an empirical absorption correction program, Bruker AXS Inc., Madison, WI, USA, **2007**.

5. CELL\_NOW: Sheldrick, G.M., **2002**.

6. TWINABS: v.2007/5, an empirical absorption correction program, Sheldrick, G.M., Bruker AXS Inc., Madison, WI, USA, **2007**.

7. SHELXTL: v. 6.14, Structure Determination Software Suite, Sheldrick, G.M., Bruker AXS Inc., Madison, WI, USA, **2004**.

8. R. G. Parr, W. Yang, Density Functional Theory of Atoms and Molecules, Oxford University Press, New York, **1989**.
